# Supplementary material
Source: Research Square preprint supplement (doi:10.21203/rs.3.rs-9881422/v1)
Supplement: Supplementary file 1 [file 4b992ee83d147a21047556cf.docx]

Supplementary Table S1 Subgroup analyses stratified by age, BMI, ALT, and family history of diabetes.

|  | Non-hypertension | Hypertension | *P*-value | Non-hypertension | Hypertension | *P*-value |
| --- | --- | --- | --- | --- | --- | --- |
| Age. | <60years | |  | ≥60years | |  |
| TyG.index | 8.05 [7.74, 8.41] | 8.47 [8.07, 8.87] | <0.001 | 8.58 [8.24, 8.92] | 8.74 [8.41, 9.10] | <0.001 |
| TG/HDL-C ratio | 1.29 [0.91, 1.92] | 1.92 [1.24, 3.09] | <0.001 | 2.03 [1.38, 3.10] | 2.44 [1.64, 3.68] | <0.001 |
| BMI | <23kg/m2 | |  | ≥23kg/m2 | |  |
| TyG.index | 7.99 [7.69, 8.32] | 8.41 [8.02, 8.78] | <0.001 | 8.38 [8.01, 8.76] | 8.72 [8.35, 9.08] | <0.001 |
| TG/HDL-C ratio | 1.19 [0.86, 1.71] | 1.67 [1.11, 2.59] | <0.001 | 1.83 [1.23, 2.77] | 2.45 [1.64, 3.76] | <0.001 |
| ALT | <40U/L | |  | ≥40U/L | |  |
| TyG.index | 8.08 [7.76, 8.46] | 8.59 [8.20, 8.96] | <0.001 | 8.50 [8.08, 8.94] | 8.93 [8.52, 9.27] | <0.001 |
| TG/HDL-C ratio | 1.32 [0.93, 1.99] | 2.12 [1.38, 3.26] | <0.001 | 2.04 [1.28, 3.25] | 3.05 [2.04, 4.59] | <0.001 |
| Family histroy of diabetes | family.histroy.of.diabetes No | |  | family.histroy.of.diabetes Yes | |  |
| TyG.index | 8.09 [7.77, 8.47] | 8.61 [8.22, 8.99] | <0.001 | 8.20 [7.84, 8.56] | 8.60 [8.32, 8.96] | <0.001 |
| TG/HDL-C ratio | 1.34 [0.93, 2.03] | 2.19 [1.41, 3.39] | <0.001 | 1.47 [1.01, 2.26] | 2.24 [1.58, 3.61] | <0.001 |

*Continuous data are expressed as median (interquartile range) due to the skewed distribution.

The *P*-value is a comparison between the normotension and hypertension groups. The direction and magnitude of differences in the TyG index and TG/HDL-C ratio were consistent across strata, with no statistically significant evidence of effect modification.TyG,triglyceride glucose;TG, triglycerides;HDL-c, high-density lipoprotein cholesterol;BMI, Body mass index; ALT, alanine aminotransferase.
